# Supplementary material for: The rapid kinetics of optimal treatment with subcutaneous methotrexate in early inflammatory arthritis: an observational study
Source: PubMed Central journal article supplement (PMC4997744; doi:10.1186/s12891-016-1213-6), 2016-08-24
Supplement: 12891_2016_1213_MOESM1_ESM.pdf [file 12891_2016_1213_MOESM1_ESM.pdf]

**Additional File 1:** Comparison of mean change in outcome measurement scores between early period (0 – 6 weeks) and late period (6 – 12 weeks). DAS28ESR: Disease Activity Score in 28 joints (using ESR); TJC28: Tender Joint Count in 28 joints; SJC28: Swollen Joint Count in 28 joints; PTGA: Patient Global Assessment; HAQ: Health Assessment Questionnaire Disability Index; MDGA: Physician Global Assessment; ESR: Erythrocyte Sedimentation Rate; CRP: C-Reactive Protein; DAS28CRP: Disease Activity Score in 28 joints (using CRP); CDAI: Clinical Disease Activity Index; SDAI: Simplified Disease Activity Index.

| <b>Change (<math>\Delta</math>) in Outcome</b> | <b>Cohort</b>       | <b>N</b> | <b>Early Period (0–6 wks)</b> | <b>Late Period (6-12 wks)</b> | <b>Mean Difference Early vs. Late</b> | <b>p</b> |
|------------------------------------------------|---------------------|----------|-------------------------------|-------------------------------|---------------------------------------|----------|
| <b><math>\Delta</math>DAS28ESR</b>             | Entire cohort       | 72       | -1.9 (0.4)                    | -0.2 (0.3)                    | -1.7 (2.2)                            | 0.00**   |
|                                                | Monotherapy         | 66       | -1.8 (1.3)                    | -0.2 (1.1)                    | -1.7 (2.1)                            | 0.00**   |
|                                                | MTX+HCQ             | 6        | -2.6 (2.4)                    | -0.9 (1.4)                    | -1.8 (3.7)                            | 0.3      |
|                                                | No Steroid          | 17       | 1.7 (1.1)                     | -0.6 (1.0)                    | -1.1 (1.8)                            | 0.02*    |
|                                                | PO Steroid          | 10       | -2.0 (1.7)                    | 0.3 (1.0)                     | -2.3 (2.3)                            | 0.01*    |
|                                                | IA Steroid          | 22       | -2.2 (1.3)                    | -0.4 (1.3)                    | -1.8 (2.4)                            | 0.00**   |
|                                                | IM Steroid          | 9        | -1.7 (1.2)                    | 0.5 (1.4)                     | -2.2 (2.3)                            | 0.02*    |
|                                                | Steroid Combination | 14       | -1.7 (1.6)                    | -0.4 (1.0)                    | -1.3 (2.4)                            | 0.06     |

|                    |                     |    |            |              |             |        |
|--------------------|---------------------|----|------------|--------------|-------------|--------|
|                    |                     |    |            |              |             |        |
| $\Delta$ TJC2<br>8 | Entire cohort       | 86 | -2.6 (1.9) | -3.0 (1.3)   | 0.4 (10.4)  | 0.7    |
|                    | Monotherapy         | 78 | -1.8 (6.5) | -3.1 (4.9)   | 1.3 (9.9)   | 0.3    |
|                    | MTX+HCQ             | 8  | -9.9 (9.6) | -1.6 (3.3)   | -8.3 (12.1) | 0.1    |
|                    | No Steroid          | 17 | -2.0 (3.9) | -2.9 (2.7)   | 0.9 (5.5)   | 0.5    |
|                    | PO Steroid          | 12 | -3.6 (6.8) | -2.5 (4.2)   | -1.1 (9.3)  | 0.7    |
|                    | IA Steroid          | 28 | -4.1 (8.8) | -2.9 (5.1)   | -1.2 (12.4) | 0.6    |
|                    | IM Steroid          | 12 | 0.08 (5.1) | -1.4 (4.9)   | 1.5 (9.0)   | 0.6    |
|                    | Steroid Combination | 17 | -1.7 (8.2) | -4.7 (6.0)   | 2.9 (12.7)  | 0.4    |
|                    |                     |    |            |              |             |        |
| $\Delta$ SJC2<br>8 | Entire cohort       | 86 | -5.9 (1.6) | -1.4 (0.9)   | -4.5 (7.7)  | 0.00** |
|                    | Monotherapy         | 76 | -5.6 (5.7) | -1.3 (3.4)   | -4.4 (7.6)  | 0.00** |
|                    | MTX+HCQ             | 7  | -8.1 (8.8) | -2.0 (2.6)   | -6.1 (10.3) | 0.1    |
|                    | No Steroid          | 17 | -3.6 (4.0) | -2.2 (1.6)   | -1.4 (4.3)  | 0.2    |
|                    | PO Steroid          | 12 | -8.0 (6.5) | 0.00 (1.2)   | -8.0 (6.7)  | 0.00** |
|                    | IA Steroid          | 28 | -7.8 (6.8) | -1.6 (3.3)   | -6.2 (8.2)  | 0.00** |
|                    | IM Steroid          | 12 | -7.4 (5.9) | 1.7 (2.8)    | -9.1 (7.9)  | 0.00*  |
|                    | Steroid Combination | 17 | -2.8 (4.0) | -3.2 (4.2)   | 0.4 (6.6)   | 0.8    |
|                    |                     |    |            |              |             |        |
| $\Delta$ Pain      | Entire cohort       | 86 | -3.4 (1.9) | -0.01 (0.75) | -3.44 (5.8) | 0.00** |
|                    | Monotherapy         | 77 | -3.3 (3.6) | 0.03 (2.9)   | -3.3 (5.9)  | 0.00** |

|          |                     |    |            |              |            |         |
|----------|---------------------|----|------------|--------------|------------|---------|
|          | MTX+HCQ             | 9  | -3.8 (3.9) | -0.4 (1.2)   | -3.4 (4.8) | 0.07    |
|          | No Steroid          | 18 | -3.1 (3.8) | -0.5 (3.6)   | -2.6 (6.7) | 0.1     |
|          | PO Steroid          | 13 | -1.7 (4.3) | -0.6 (3.3)   | -1.1 (7.0) | 0.6     |
|          | IA Steroid          | 27 | -4.5 (3.3) | 0.4 (2.5)    | -4.9 (4.9) | 0.00**  |
|          | IM Steroid          | 12 | -3.1 (3.4) | 1.1 (2.3)    | -4.3 (5.2) | 0.02*   |
|          | Steroid Combination | 16 | -3.2 (3.4) | -0.6 (2.4)   | -2.7 (5.2) | 0.06    |
|          |                     |    |            |              |            |         |
| ΔFatigue | Entire cohort       | 86 | -2.0 (0.8) | -0.2 (0.7)   | -1.8 (5.0) | 0.001** |
|          | Monotherapy         | 77 | -1.9 (3.1) | -0.2 (2.7)   | -1.8 (5.0) | 0.003** |
|          | MTX+HCQ             | 9  | -2.2 (4.0) | -0.4 (1.3)   | -2.3 (5.3) | 0.2     |
|          | No Steroid          | 18 | -1.0 (3.6) | -1.6 (3.1)   | 0.6 (5.9)  | 0.7     |
|          | PO Steroid          | 13 | -1.7 (3.6) | -0.2 (3.5)   | -1.6 (6.3) | 0.4     |
|          | IA Steroid          | 25 | -2.7 (3.4) | -0.4 (2.4)   | -2.3 (5.0) | 0.02*   |
|          | IM Steroid          | 12 | -1.8 (2.7) | 0.8 (1.3)    | -2.6 (3.4) | 0.02*   |
|          | Steroid Combination | 14 | -2.2 (2.2) | 1.1 (1.7)    | -3.3 (3.0) | 0.00**  |
|          |                     |    |            |              |            |         |
| ΔSleep   | Entire cohort       | 82 | -2.7 (0.9) | -0.003 (1.3) | -2.6 (5.0) | 0.00**  |
|          | Monotherapy         | 75 | -2.6 (3.4) | -0.007 (2.7) | -2.6 (5.1) | 0.00**  |
|          | MTX+HCQ             | 7  | -3.2 (3.4) | -0.4 (1.3)   | -2.7 (4.4) | 0.2     |
|          | No Steroid          | 18 | -2.3 (3.6) | -0.1 (3.3)   | -2.2 (6.0) | 0.1     |
|          | PO Steroid          | 13 | -2.1 (3.6) | 0.8 (1.9)    | -2.9 (4.5) | 0.04*   |

|           |                     |    |            |             |              |        |
|-----------|---------------------|----|------------|-------------|--------------|--------|
|           | IA Steroid          | 25 | -3.2 (4.0) | -0.4 (3.0)  | -2.8 (5.8)   | 0.02*  |
|           | IM Steroid          | 12 | -2.9 (2.5) | 0.7 (1.9)   | -3.6 (4.0)   | 0.01** |
|           | Steroid Combination | 14 | -2.4 (2.8) | -0.8 (1.5)  | -1.7 (3.3)   | 0.08   |
|           |                     |    |            |             |              |        |
| ΔPTG<br>A | Entire cohort       | 86 | -3.8 (1.9) | 0.15 (0.8)  | -3.9 (5.8)   | 0.00** |
|           | Monotherapy         | 77 | -3.8 (3.5) | 0.3 (2.9)   | -4.08 (5.70) | 0.00** |
|           | MTX+HCQ             | 9  | -3.8 (4.4) | -1.2 (2.8)  | -2.7 (6.8)   | 0.3    |
|           | No Steroid          | 18 | -3.8 (3.6) | -0.6 (2.6)  | -3.3 (5.6)   | 0.03*  |
|           | PO Steroid          | 13 | -2.7 (4.7) | -0.2 (4.0)  | -2.5 (8.1)   | 0.3    |
|           | IA Steroid          | 27 | -4.1 (3.4) | 0.2 (3.3)   | -4.3 (5.9)   | 0.00** |
|           | IM Steroid          | 12 | -3.3 (2.6) | 1.2 (1.6)   | -4.5 (3.9)   | 0.00** |
|           | Steroid Combination | 16 | -4.5 (3.3) | 0.5 (2.7)   | -4.9 (5.1)   | 0.00** |
|           |                     |    |            |             |              |        |
| ΔHAQ      | Entire cohort       | 73 | -0.4 (0.2) | -0.3 (0.1)  | -0.2 (0.9)   | 0.1    |
|           | Monotherapy         | 66 | -0.5 (0.6) | -0.3 (0.4)  | -0.2 (0.8)   | 0.05*  |
|           | MTX+HCQ             | 7  | -0.2 (1.2) | -0.4 (0.06) | 0.2 (1.7)    | 0.8    |
|           | No Steroid          | 16 | -0.3 (0.7) | 0.4 (0.5)   | 0.1 (0.9)    | 0.7    |
|           | PO Steroid          | 10 | -0.5 (0.5) | -0.2 (0.3)  | -0.3 (0.8)   | 0.2    |
|           | IA Steroid          | 23 | -0.5 (0.8) | -0.3 (0.6)  | -0.2 (1.2)   | 0.4    |
|           | IM Steroid          | 12 | 0.5 (0.6)  | -0.09 (0.3) | -0.4 (0.8)   | 0.1    |
|           | Steroid             | 12 | 0.4 (0.6)  | -0.3 (0.3)  | -0.09 (0.7)  | 0.7    |

|           | Combination            |    |              |              |              |        |
|-----------|------------------------|----|--------------|--------------|--------------|--------|
|           |                        |    |              |              |              |        |
| AMD<br>GA | Entire cohort          | 82 | -3.1 (0.7)   | -0.6 (0.6)   | -2.5 (3.9)   | 0.00** |
|           | Monotherapy            | 74 | -3.0 (2.7)   | -0.5 (2.0)   | -2.5 (3.9)   | 0.00** |
|           | MTX+HCQ                | 8  | -4.1 (2.7)   | -0.9 (1.9)   | -3.2 (4.0)   | 0.06   |
|           | No Steroid             | 17 | 2.5 (1.8)    | -0.6 (2.1)   | -1.9 (3.0)   | 0.02*  |
|           | PO Steroid             | 11 | -3.5 (2.5)   | 0.3 (1.2)    | -3.8 (2.6)   | 0.00** |
|           | IA Steroid             | 26 | -3.4 (3.2)   | -0.9 (1.9)   | -2.6 (4.4)   | 0.01*  |
|           | IM Steroid             | 12 | -3.5 (2.6)   | 0.3 (1.4)    | -3.8 (3.6)   | 0.00** |
|           | Steroid<br>Combination | 16 | -2.6 (3.0)   | -1.2 (2.8)   | -1.4 (4.7)   | 0.3    |
|           |                        |    |              |              |              |        |
| ΔESR      | Entire cohort          | 76 | -9.0 (10.5)  | -3.8 (9.1)   | -5.2 (66.5)  | 0.5    |
|           | Monotherapy            | 69 | -7.3 (37.1)  | -4.6 (33.8)  | -2.7 (67.8)  | 0.8    |
|           | MTX+HCQ                | 7  | -25.7 (38.4) | 4.6 (13.7)   | -30.3 (48.7) | 0.2    |
|           | No Steroid             | 17 | -10.0 (18.0) | -0.4 (6.6)   | -9.6 (20.3)  | 0.07   |
|           | PO Steroid             | 11 | 23.4 (76.6)  | -21.9 (76.1) | 45.3 (152.4) | 0.4    |
|           | IA Steroid             | 24 | -19.7 (26.2) | -0.5 (19.4)  | -19.2 (34.6) | 0.01*  |
|           | IM Steroid             | 10 | -12.4 (13.6) | -1.3 (10.3)  | -11.1 (20.4) | 0.1    |
|           | Steroid<br>Combination | 14 | -12.3 (26.1) | -0.9 (23.2)  | -11.4 (46.0) | 0.4    |
|           |                        |    |              |              |              |        |
| ΔCRP      | Entire cohort          | 33 | -13.8 (7.6)  | -4.4 (7.0)   | -9.38 (24.5) | 0.04*  |

|                           |                        |    |              |              |              |        |
|---------------------------|------------------------|----|--------------|--------------|--------------|--------|
|                           | Monotherapy            | 29 | -11.1 (15.2) | -4.3 (16.7)  | -6.8 (24.0)  | 0.1    |
|                           | MTX+HCQ                | 4  | -33.3 (20.1) | -4.95 (10.0) | -28.3 (22.7) | 0.09   |
|                           | No Steroid             | 5  | -14.8 (19.8) | -4.0 (9.0)   | -10.8 (16.5) | 0.2    |
|                           | PO Steroid             | 4  | -16.5 (28.5) | 3.0 (5.4)    | -19.5 (26.9) | 0.2    |
|                           | IA Steroid             | 14 | -14.3 (17.2) | -2.8 (6.3)   | -11.5 (19.2) | 0.04*  |
|                           | IM Steroid             | 4  | -19.5 (18.8) | -0.5 (1.0)   | -18.0 (18.9) | 0.2    |
|                           | Steroid<br>Combination | 6  | -6.6 (6.2)   | -16.0 (34.8) | 9.3 (38.2)   | 0.6    |
|                           |                        |    |              |              |              |        |
| ΔDAS<br><br>28CR<br><br>P | Entire cohort          | 32 | -2.3 (0.7)   | -0.2 (0.5)   | -2.2 (2.3)   | 0.00** |
|                           | Monotherapy            | 28 | -2.2 (1.2)   | -0.06 (1.1)  | -2.1 (1.9)   | 0.00** |
|                           | MTX+HCQ                | 4  | -3.0 (3.2)   | -0.9 (1.5)   | -2.1 (4.7)   | 0.4    |
|                           | No Steroid             | 5  | -1.5 (1.2)   | -0.9 (1.2)   | -0.6 (2.4)   | 0.6    |
|                           | PO Steroid             | 4  | -3.8 (1.6)   | 0.7 (1.0)    | -4.5 (1.8)   | 0.02*  |
|                           | IA Steroid             | 13 | -2.6 (1.5)   | -0.3 (1.2)   | -2.6 (2.2)   | 0.00** |
|                           | IM Steroid             | 4  | -1.6 (1.2)   | 0.5 (1.2)    | -2.1 (2.2)   | 0.2    |
|                           | Steroid<br>Combination | 6  | -1.8 (1.5)   | -0.8 (0.5)   | -1.0 (1.9)   | 0.3    |
|                           |                        |    |              |              |              |        |
| ΔCDA<br><br>I             | Entire cohort          | 82 | 15.3 (3.7)   | -4.6 (2.7)   | -10.9 (20.1) | 0.00** |
|                           | Monotherapy            | 74 | -14.2 (12.0) | -4.5 (10.3)  | -9.7 (18.9)  | 0.00** |
|                           | MTX+HCQ                | 8  | -26.0 (22.8) | -5.8 (8.3)   | -20.2 (29.2) | 0.09   |
|                           | No Steroid             | 17 | -12.4 (7.7)  | -6.0 (5.8)   | -6.4 (10.5)  | 0.02*  |

|           |                        |    |              |              |              |         |
|-----------|------------------------|----|--------------|--------------|--------------|---------|
|           | PO Steroid             | 11 | -17.7 (17.0) | -2.0 (7.0)   | -15.8 (20.0) | 0.02*   |
|           | IA Steroid             | 26 | -18.5 (16.0) | -5.6 (11.1)  | -12.8 (23.1) | 0.01**  |
|           | IM Steroid             | 12 | -14.4 (11.5) | 2.0 (8.3)    | -16.4 (17.9) | 0.1     |
|           | Steroid<br>Combination | 16 | -12.5 (13.9) | -8.5 (12.7)  | -4.0 (23.8)  | 0.5     |
|           |                        |    |              |              |              |         |
| ΔSDA<br>I | Entire cohort          | 31 | -33.6 (11.6) | -6.9 (8.7)   | -26.8 (36.4) | 0.00**  |
|           | Monotherapy            | 27 | -29.9 (20.5) | -6.0 (19.8)  | -23.8 (33.3) | 0.001** |
|           | MTX+HCQ                | 4  | -59.0 (42.7) | -12.5 (14.6) | -46.5 (55.6) | 0.19    |
|           | No Steroid             | 5  | -12.4 (12.5) | -11.1 (12.9) | -15.3 (16.0) | 0.1     |
|           | PO Steroid             | 4  | -51.4 (38.7) | 5.0 (6.8)    | -56.4 (36.4) | 0.05*   |
|           | IA Steroid             | 12 | -37.4 (26.4) | -2.5 (11.2)  | -35.0 (30.3) | 0.00**  |
|           | IM Steroid             | 4  | -32.8 (24.9) | 1.5 (11.5)   | -34.4 (33.4) | 0.1     |
|           | Steroid<br>Combination | 6  | -20.7 (20.0) | -25.5 (32.0) | 4.8 (45.1)   | 0.8     |
